# Supplementary material for: Unlocking the catalytic activity of an eight-atom gold cluster with a Pd atom
Source: Royal Society of Chemistry journal article supplement (doi:10.1039/c9nr10198e), 2020-01-01
Supplement: c9nr10198e1.pdf [file c9nr10198e1.pdf]

## Supporting Information

### Unlocking the Catalytic Activity of an Eight-atom Gold Cluster with a Pd Atom

Jiayu Xu,<sup>1</sup> Shun Xu,<sup>1</sup> Mingyang Chen,<sup>2,3\*</sup> and Yan Zhu<sup>1,\*</sup>

<sup>1</sup>School of Chemistry and Chemical Engineering, Nanjing University, Nanjing 210093, China

<sup>2</sup>Center for Green Innovation, School of Materials Science and Engineering, University of Science and Technology Beijing, Beijing 100083, China

<sup>3</sup>Beijing Computational Science Research Center, Beijing 100193, China

#### Supporting Figures and Tables

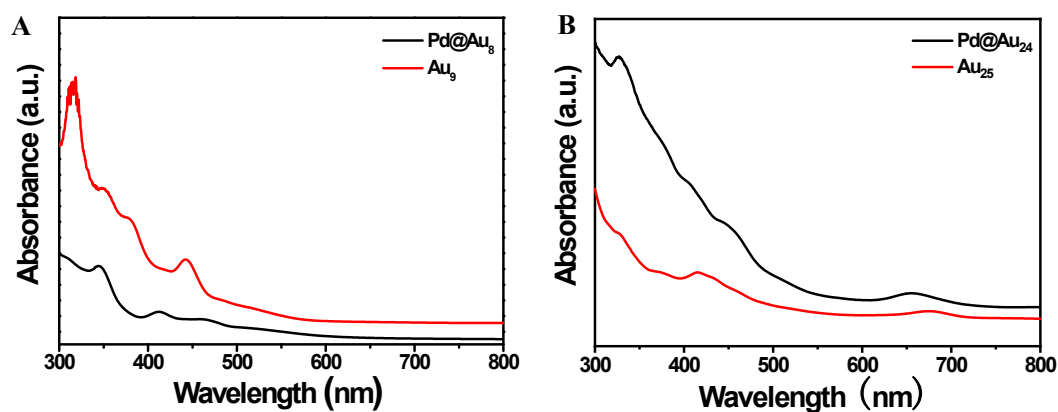

**Figure S1.** UV-vis spectra of (A) fresh  $\text{Au}_8\text{Pd}$  and  $\text{Au}_9$ ; (B) fresh  $\text{Au}_{24}\text{Pd}$  and  $\text{Au}_{25}$  clusters.

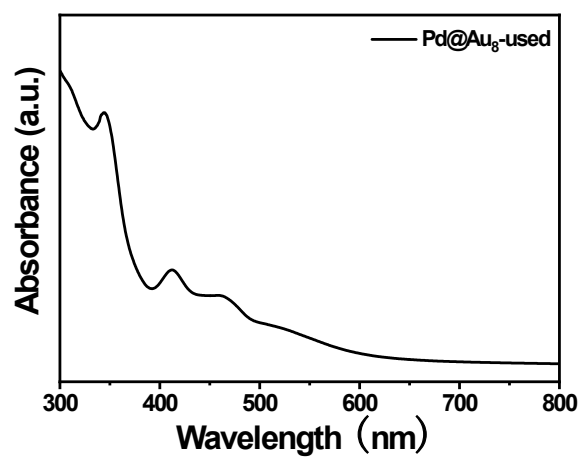

**Figure S2.** UV-vis spectrum of the spent Au<sub>8</sub>Pd solved in CH<sub>2</sub>Cl<sub>2</sub>.

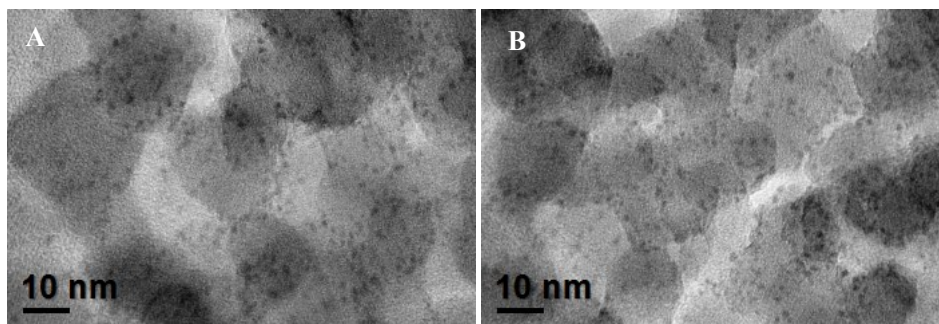

**Figure S3.** TEM images of the Au<sub>8</sub>Pd/SiO<sub>2</sub> catalysts (A) before reaction and (B) after reaction.

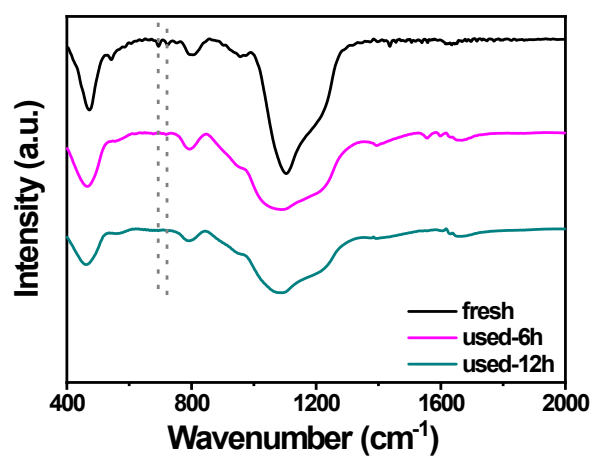

**Figure S4.** IR spectra of the Au<sub>8</sub>Pd catalyst before reaction and after reaction.

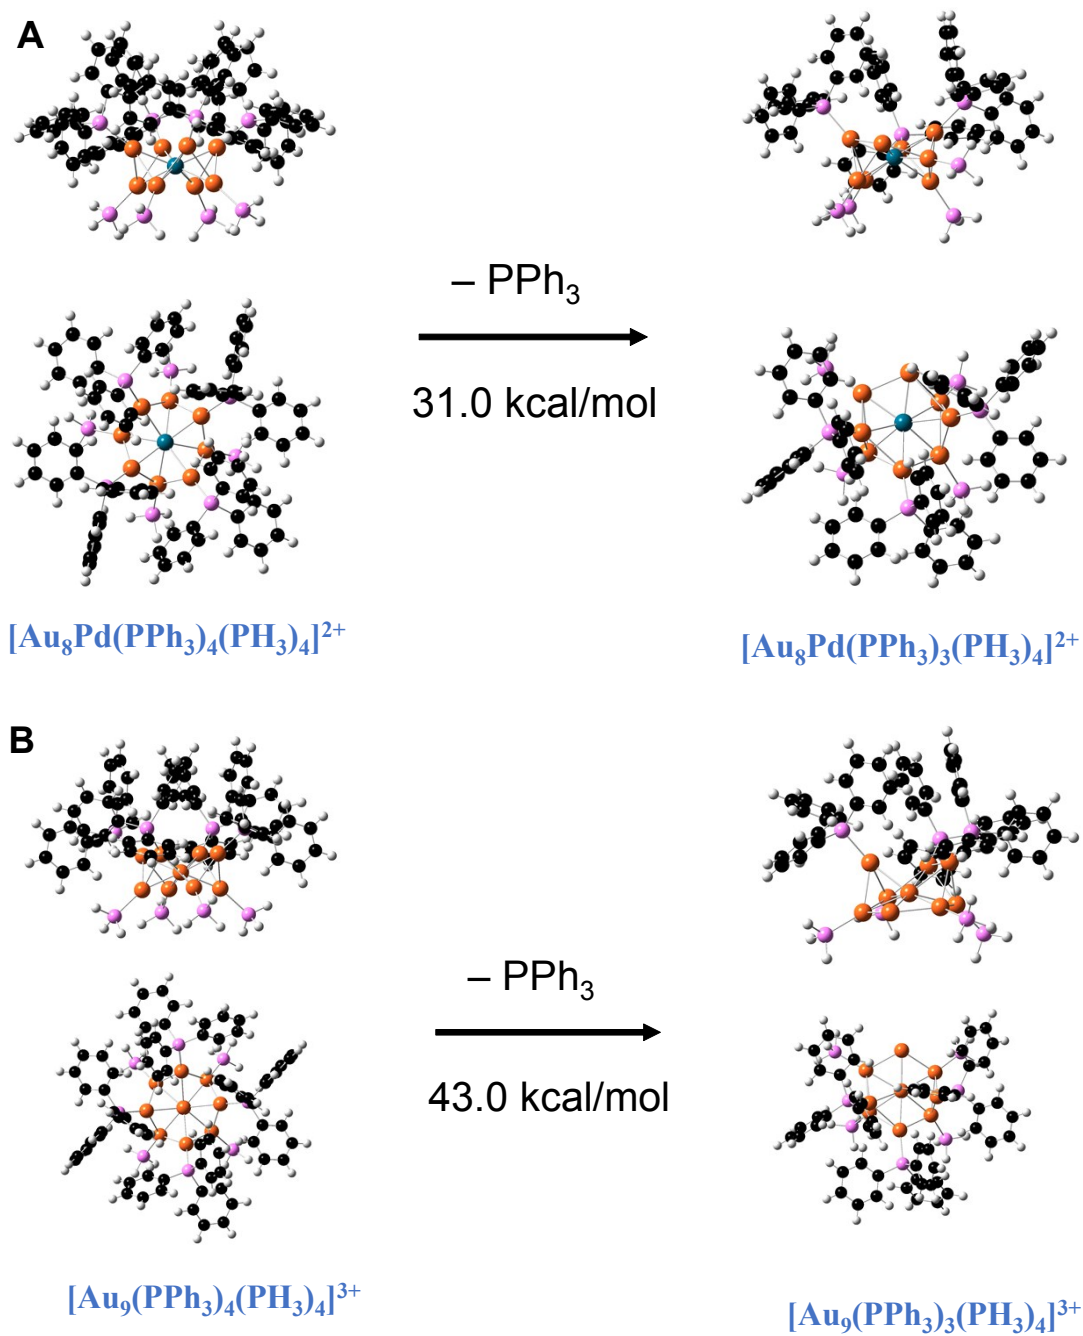

**Figure S5.** Depassivation of (A)  $[\text{Au}_8\text{Pd}(\text{PPh}_3)_4(\text{PH}_3)_4]^{2+}$  and (B)  $[\text{Au}_8\text{Pd}(\text{PPh}_3)_4(\text{PH}_3)_4]^{2+}$  by the removal of one PPh<sub>3</sub>. All of the species are ground state singlets. Color code: orange = Au, dark-cyan = Pd, red = O, black = C, pink = P, and grey = H.

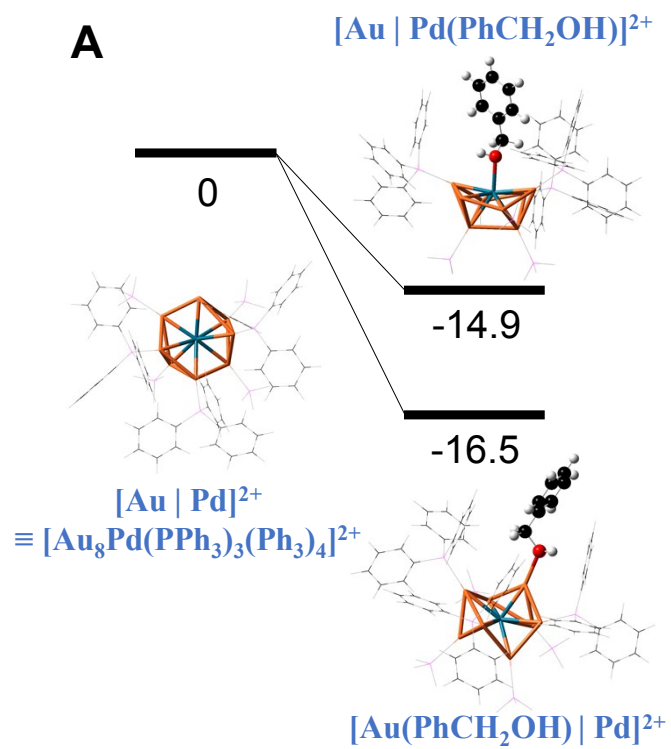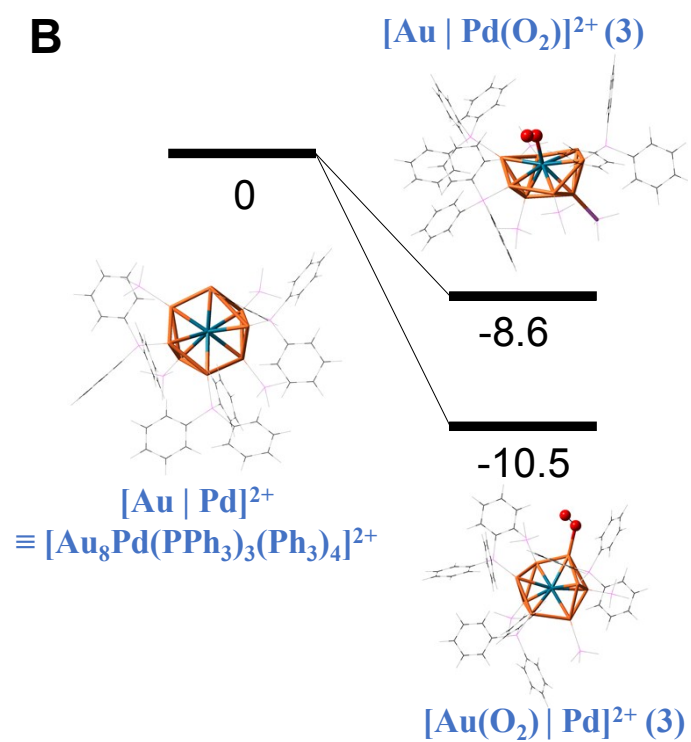

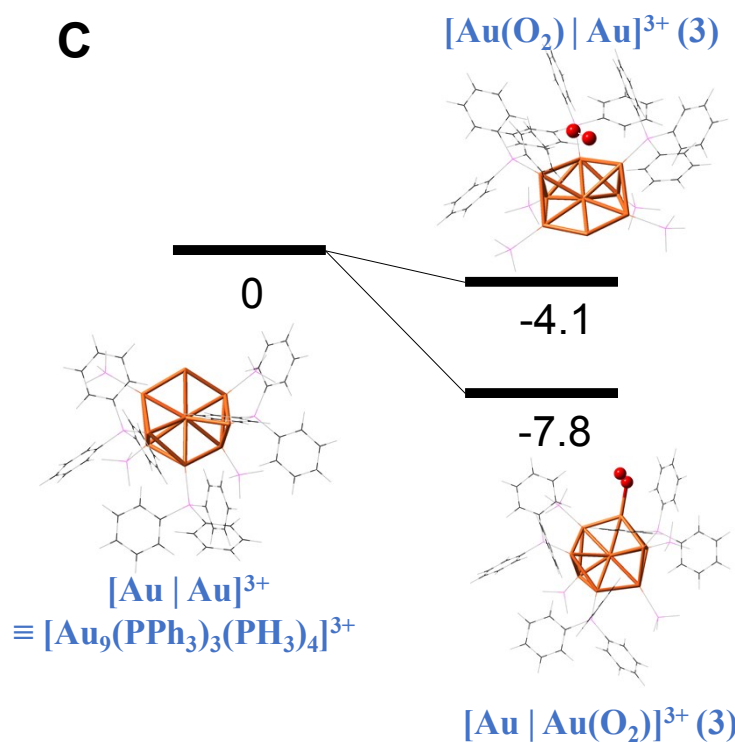

**Figure S6.** Adsorption of (A) benzyl alcohol over  $[\text{Au}_8\text{Pd}(\text{PPh}_3)_3(\text{PH}_3)_4]^{2+}$ , (B)  $\text{O}_2$  over  $[\text{Au}_8\text{Pd}(\text{PPh}_3)_3(\text{PH}_3)_4]^{2+}$ , and (C)  $\text{O}_2$  over  $[\text{Au}_9(\text{PPh}_3)_3(\text{PH}_3)_4]^{3+}$ . All of the species are ground state singlets unless otherwise indicated. Triplet ground states are indicated by '(3)'. Color code: orange = Au, dark-cyan = Pd, red = O, black = C, pink = P, and grey = H. Adsorption enthalpies are in kcal/mol.

**Table S1.** Predicted deprotonation energies for relevant species in the benzyl alcohol oxidation reactions with O<sub>2</sub> catalyzed by Au<sub>8</sub>Pd at the PBE/LANL2DZ level. All ground-state species are singlet unless otherwise noted ('(3)' for triplet).

| Reactant                                                           | Product                                                          | Deprotonation Energy<br>kcal/mol |
|--------------------------------------------------------------------|------------------------------------------------------------------|----------------------------------|
| PhCH <sub>3</sub>                                                  | PhCH <sub>2</sub> <sup>-</sup>                                   | 383.3                            |
| PhCH <sub>2</sub> OH                                               | PhCH <sub>2</sub> O <sup>-</sup>                                 | 366.9                            |
| [Au(PhCH <sub>2</sub> OH)   Pd(O <sub>2</sub> )] <sup>2+</sup> (3) | [Au(PhCH <sub>2</sub> O)   Pd(O <sub>2</sub> )] <sup>+</sup> (3) | 231.8                            |
| [Au(PhCH <sub>2</sub> O)   Pd(OOH)] <sup>2+</sup>                  | [Au(PhCHO)   Pd(OOH)] <sup>+</sup>                               | 209.4                            |
| [Au(PhCH <sub>2</sub> OH)   PdO] <sup>2+</sup> (3)                 | [Au(PhCH <sub>2</sub> O)   PdO] <sup>+</sup> (3)                 | 234.3                            |
| [Au(PhCH <sub>2</sub> O)   PdOH] <sup>2+</sup>                     | [Au(PhCHO)   PdOH] <sup>2+</sup>                                 | 205.9                            |

**Table S2.** Predicted proton affinities for relevant species in the benzyl alcohol oxidation reactions catalyzed by Au<sub>8</sub>Pd at the PBE/LANL2DZ level. All ground-state species are singlet unless otherwise noted ('(3)' for triplet).

| Reactant                                                         | Product                                                   | Proton affinity<br>kcal/mol |
|------------------------------------------------------------------|-----------------------------------------------------------|-----------------------------|
| O <sub>2</sub> (3)                                               | O <sub>2</sub> H <sup>+</sup> (3)                         | 96.9                        |
| CO <sub>3</sub> <sup>2-</sup>                                    | HCO <sub>3</sub> <sup>-</sup>                             | 493.3                       |
| HCO <sub>3</sub> <sup>-</sup>                                    | H <sub>2</sub> CO <sub>3</sub>                            | 331.7                       |
| [Au(PhCH <sub>2</sub> O)   Pd(O <sub>2</sub> )] <sup>+</sup> (3) | [Au(PhCH <sub>2</sub> O)   Pd(OOH)] <sup>2+</sup>         | 218.0                       |
| [Au(PhCHO)   Pd(OOH)] <sup>+</sup>                               | [Au(PhCHO)   PdO] <sup>2+</sup> (3) +<br>H <sub>2</sub> O | 232.4                       |
| [Au(PhCH <sub>2</sub> O)   PdO] <sup>+</sup> (3)                 | [Au(PhCH <sub>2</sub> O)   PdOH] <sup>2+</sup> (3)        | 247.2                       |
| [Au(PhCHO)   PdOH] <sup>+</sup>                                  | [Au(PhCHO)   Pd] <sup>2+</sup> + H <sub>2</sub> O         | 205.9                       |
